# Supplementary figures and images for: Gene Instability-Related lncRNA Prognostic Model of Melanoma Patients via Machine Learning Strategy
Source: Hindawi journal article supplement (doi:10.1155/2021/5582920), 2021-05-25

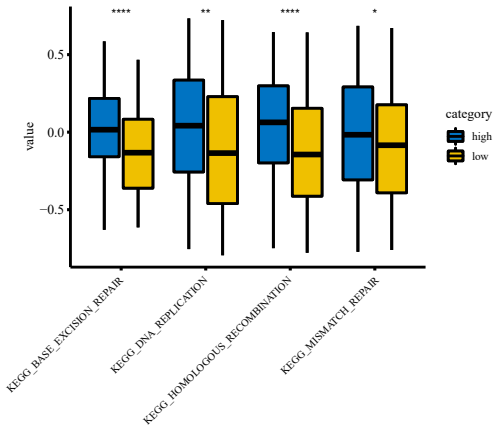

Supplement: f1 [file 5582920.f1.zip]
